# Supplementary material
Source: PubMed Central journal article supplement (PMC3079841)
Supplement: npp201116x1.pdf [file npp201116x1.pdf]

Supplementary Table 1:

Regression analyses on the effect of rs17070145 on the AVLT subtests (main analysis, CC is reference group, basic model)

| <b>Test</b>                    | <b>Domain</b>                      | <b>Regression coefficient <math>\beta</math> for parameter CT/TT</b> | <b>p-value</b> |
|--------------------------------|------------------------------------|----------------------------------------------------------------------|----------------|
|                                | Verbal memory<br>(composite score) | 0.037                                                                | 0.648          |
| AVLT 1 – immediate verbal span | Verbal memory                      | 0.015                                                                | 0.920          |
| AVLT 5 – Verbal learning       | Verbal memory                      | 0.167                                                                | 0.281          |
| AVLT 1-5 – Slope of learning   | Verbal memory                      | 0.128                                                                | 0.848          |
| AVLT 6 – Short term retrieval  | Verbal memory                      | 0.106                                                                | 0.650          |
| AVLT 7 – Long term retrieval   | Verbal memory                      | 0.155                                                                | 0.491          |
| AVLT 8 – Recognition           | Verbal memory                      | 0.025                                                                | 0.907          |

Supplementary Table 2:

Regression analyses on the effect of rs17070145 on the AVLT subtests (main analysis, CC is reference group, basic model) adjusted for executive functions.

| <b>Test</b>                    | <b>Domain</b>                      | <b>Regression coefficient <math>\beta</math> for parameter CT/TT</b> | <b>p-value</b> |
|--------------------------------|------------------------------------|----------------------------------------------------------------------|----------------|
|                                | Verbal memory<br>(composite score) | 0.024                                                                | 0.765          |
| AVLT 1 – immediate verbal span | Verbal memory                      | 0.002                                                                | 0.988          |
| AVLT 5 – Verbal learning       | Verbal memory                      | 0.170                                                                | 0.275          |
| AVLT 1-5 – Slope of learning   | Verbal memory                      | 0.112                                                                | 0.867          |
| AVLT 6 – Short term retrieval  | Verbal memory                      | 0.136                                                                | 0.562          |
| AVLT 7 – Long term retrieval   | Verbal memory                      | 0.159                                                                | 0.481          |
| AVLT 8 – Recognition           | Verbal memory                      | 0.051                                                                | 0.807          |
